# Supplementary material for: High-resolution mapping of tuberculosis transmission: Whole genome sequencing and phylogenetic modelling of a cohort from Valencia Region, Spain
Source: PubMed Central journal article supplement (PMC6822721; doi:10.1371/journal.pmed.1002961), 2019-10-31
Supplement: pmed.1002961.s014.pdf [file pmed.1002961.s014.pdf]

**S1 Table. Meta-analysis table for different published MTBC clock rates.**

| <b>Reference</b>           | <b>Publication Year</b> | <b>MTBC Lineage</b> | <b>No. of samples</b> | <b>Clock rate (genome per year)</b> |
|----------------------------|-------------------------|---------------------|-----------------------|-------------------------------------|
| Ford et al.[5]             | 2011                    | L4                  | 33                    | 0.34                                |
| Walker et al.[6]           | 2013                    | All                 | 390                   | 0.50                                |
| Bryant et al[7]            | 2013                    | L1, L2, L3 and L4   | 199                   | 0.30                                |
| Ford et al.[8]             | 2013                    | L4                  | 36                    | 0.36                                |
| Roetzer at al.[2]          | 2013                    | L4                  | 86                    | 0.44                                |
| Bos et al.[9]              | 2014                    | All                 | 261                   | 0.22                                |
| Merker et al. [10]         | 2015                    | L2                  | 110                   | 0.44                                |
| Luo et al.[11]             | 2015                    | L2                  | 393                   | 0.20                                |
| Eldhom et al.[12]          | 2015                    | L4                  | 252                   | 0.29                                |
| Kay et al.[13]             | 2015                    | L4                  | 165                   | 0.22                                |
| Duchêne et al.[1]          | 2016                    | All and L4          | 261 and 252           | 0.24 and 0.25                       |
| Bjorn-Mortensen et al.[14] | 2016                    | L4                  | 182                   | 0.47                                |
| Liu et al.[15]             | 2018                    | All                 | 160                   | 0.20                                |
| Merker et al.[16]          | 2018                    | L2                  | 220                   | 0.41                                |
| Duchêne et al.[17]         | 2018                    | L2                  | 110                   | 0.41                                |
| Rutaihwa et al.[18]        | 2018                    | L2                  | 308                   | 0.59                                |
| Brynildsrud et al.[19]     | 2018                    | L4                  | 269                   | 0.21                                |
| Meehan et al.[20]          | 2018                    | L4 and L5           | 324                   | 0.14                                |
