# Supplementary material for: High-resolution mapping of tuberculosis transmission: Whole genome sequencing and phylogenetic modelling of a cohort from Valencia Region, Spain
Source: PLOS journal article supplement (doi:10.1371/journal.pmed.1002961), 2019-10-31

**S2 Fig. Trace plot of model parameters colored by the simulated clock rates.** The figure shows the trace plot of within-host diversity (*neg*), the offspring distribution parameter (*off.r*) and the sampling proportion (*pi*) from the MCMC run.

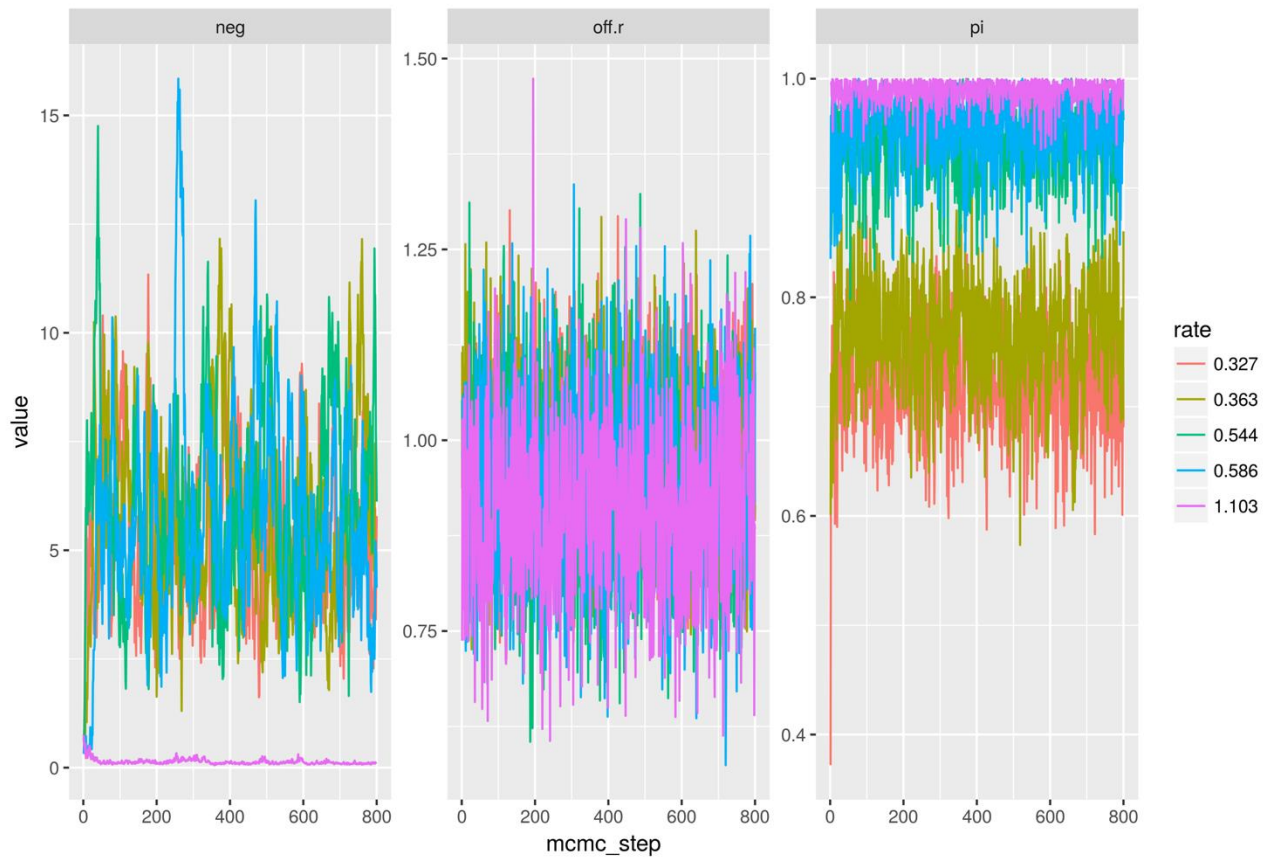

Supplement: S2 (10.1371/journal.pmed.1002961.s002) [file journal.pmed.1002961.s002]
